# Supplementary material for: Evaluation of the glycemic effect of Ceratonia siliqua pods (Carob) on a streptozotocin-nicotinamide induced diabetic rat model
Source: PeerJ. 2018 May 23;6:e4788. doi: 10.7717/peerj.4788 (PMC5970558; doi:10.7717/peerj.4788)
Supplement: Data S2 — The dataset contains three technical replicates of measuring the ability to scavenge DPPH radical by methanolic carob extract as well as positive controls (quercetin and trolox). [file peerj-06-4788-s002.xlsx]

## Sheet: Sheet1
	Methanolic Carob extract							Quercetin							Trolox
Conc (uM)	Final Conc	1st technical replicate					Conc (uM)	Final Conc	1st technical replicate					Conc (uM)	Final Conc	1st technical replicate
		A1	A2	A3	Aveg				A1	A2	A3	Aveg				A1	A2	A3	Aveg
Ac		0.3088	0.3091	0.3058	0.31		Ac		0.3055	0.307	0.3094	0.31		Ac		0.3013	0.3043	0.3048	0.3
7.18125	1.2	0.208	0.208	0.2059	0.21		7.18125	1.2	0.1999	0.1994	0.2028	0.2		10	2	0.2756	0.2813	0.2725	0.28
15.625	2.6	0.2067	0.207	0.2015	0.21		15.625	2.6	0.1893	0.1924	0.1947	0.19		25	4	0.2321	0.222	0.2398	0.23
31.125	5.2	0.2026	0.2045	0.199	0.2		31.125	5.2	0.1792	0.1815	0.1874	0.18		50	8	0.135	0.1342	0.1356	0.13
62.5	10.4	0.1614	0.1794	0.1569	0.17		62.5	10.4	0.1373	0.1431	0.1404	0.14		150	25	0.0769	0.0754	0.075	0.08
125	20.8	0.1366	0.1418	0.1259	0.13		125	20.8	0.1107	0.1123	0.114	0.11		300	50	0.0414	0.041	0.044	0.04
250	41.7	0.0921	0.1005	0.0962	0.1		250	41.7	0.075	0.0824	0.0803	0.08
500	83.3	0.0705	0.0626	0.0665	0.07		500	83.3	0.042	0.0515	0.063	0.05
Conc (uM)	Final Conc	2nd technical replicate					Conc (uM)	Final Conc	2nd technical replicate					Conc (uM)	Final Conc	2nd technical replicate
		A1	A2	A3	Aveg				A1	A2	A3	Aveg				A1	A2	A3	Aveg
Ac		0.3061	0.3032	0.3026	0.3		Ac		0.304	0.3045	0.3047	0.3		Ac		0.3056	0.3081	0.3066	0.31
7.18125	1.2	0.2313	0.2409	0.2332	0.24		7.18125	1.2	0.1968	0.1913	0.1984	0.2		10	2	0.2917	0.2912	0.2504	0.28
15.625	2.6	0.2015	0.2296	0.2096	0.21		15.625	2.6	0.1875	0.1813	0.1915	0.19		25	4	0.2552	0.2385	0.23311	0.24
31.125	5.2	0.1989	0.2109	0.1941	0.2		31.125	5.2	0.1762	0.176	0.1849	0.18		50	8	0.1206	0.1396	0.1205	0.13
62.5	10.4	0.155	0.1757	0.1639	0.16		62.5	10.4	0.1319	0.141	0.1562	0.14		150	25	0.0894	0.0192	0.09712	0.07
125	20.8	0.1197	0.127	0.1059	0.12		125	20.8	0.1013	0.1237	0.1215	0.12		300	50	0.0436	0.0416	0.0528	0.05
250	41.7	0.0908	0.10141	0.0947	0.1		250	41.7	0.0743	0.0927	0.0878	0.08
500	83.3	0.0672	0.075	0.0712	0.07		500	83.3	0.0504	0.0701	0.0614	0.06
Conc (uM)	Final Conc	3rd technical replicate					Conc (uM)	Final Conc	3rd technical replicate					Conc (uM)	Final Conc	3rd technical replicate
		A1	A2	A3	Aveg				A1	A2	A3	Aveg				A1	A2	A3	Aveg
Ac		0.3038	0.3061	0.3052	0.31		Ac		0.3097	0.3005	0.3012	0.3		Ac		0.3093	0.3073	0.3064	0.31
7.18125	1.2	0.2412	0.254	0.2418	0.25		7.18125	1.2	0.1898	0.1967	0.1929	0.19		10	2	0.2749	0.2871	0.2784	0.28
15.625	2.6	0.2126	0.2375	0.2278	0.23		15.625	2.6	0.1861	0.188	0.192	0.19		25	4	0.2479	0.2532	0.232	0.24
31.125	5.2	0.1931	0.1987	0.2094	0.2		31.125	5.2	0.176	0.1777	0.1742	0.18		50	8	0.1416	0.1304	0.1204	0.13
62.5	10.4	0.1661	0.1565	0.1692	0.16		62.5	10.4	0.1202	0.148	0.1317	0.13		150	25	0.0982	0.0468	0.0918	0.08
125	20.8	0.1107	0.1064	0.1258	0.11		125	20.8	0.1013	0.1295	0.102	0.11		300	50	0.0366	0.0637	0.0448	0.05
250	41.7	0.0941	0.0992	0.0946	0.1		250	41.7	0.0975	0.0877	0.1026	0.1
500	83.3	0.0708	0.0611	0.0608	0.06		500	83.3	0.07	0.0505	0.0614	0.06
