# Supplementary material for: Evaluation of the glycemic effect of Ceratonia siliqua pods (Carob) on a streptozotocin-nicotinamide induced diabetic rat model
Source: PeerJ. 2018 May 23;6:e4788. doi: 10.7717/peerj.4788 (PMC5970558; doi:10.7717/peerj.4788)
Supplement: Data S3 — The dataset contains raw triplicates absorbance of methanolic carob extract, trolox and quercetin against FRAP. Ferrous sulphate standard absorbance is inculded. [file peerj-06-4788-s003.xlsx]

## Sheet: Sheet1
			FRAP ASSAY									FeSo4 (STD)
											A1	A2	A3	Avg	Avg-blnk
		zero minute				8 minutes				Blank	0.2042	0.201	0.1929	0.199367	0
	A1	A2	A3			A1	A2	A3		100	0.2142	0.2167	0.2151	0.215333	0.0159667
Carob	0.9981	0.9693	0.9395		Carob	1.639	1.5931	1.6009		200	0.2693	0.2492	0.2425	0.253667	0.0543
trolox	2.1521	2.2716	2.365		trolox	3.4103	3.6476	3.6017		400	0.2714	0.2754	0.2683	0.2717	0.0723333
Quercetin	2.0081	2.0281	2.1288		Quercetin	3.586	3.15	3.3792		600	0.302	0.3002	0.2961	0.299433	0.100067
Blank	0.1983	0.1916	0.1975	0.1958	Blank	0.1991	0.1964	0.1971	0.197533	800	0.3255	0.3568	0.3265	0.336267	0.136967
										1000	0.3989	0.3968	0.3993	0.398333	0.198967
	As-Ab (0 min)					As-Ab (8 min)
Carob	0.8023	0.7735	0.7437			1.4415	1.3956	1.4034
trolox	1.9563	2.0758	2.1692			3.2128	3.4501	3.4042
Quercetin	1.8123	1.8323	1.933			3.3885	2.9525	3.1817
		samples	As8min-As0min		As8min-As0min		As8min-As0min
		Carob	0.6392		0.6221		0.6597
		trolox	1.2565		1.3743		1.235
		Quercetin	1.5762		1.1202		1.2487
			y=.0002x + 0.002
		Sample	FRA Mm/L	FRA Mm/L	FRA Mm/L	average	STD	SEM
		Carob	3186	3100.5	3288.5	3191.67	94.128	54.3448
		trolox	6272.5	6861.5	6165	6433	374.964	216.486
		Quercetin	7871	5591	6233.5	6565.17	1175.63	678.749
