# Supplementary material for: Evaluation of the glycemic effect of Ceratonia siliqua pods (Carob) on a streptozotocin-nicotinamide induced diabetic rat model
Source: PeerJ. 2018 May 23;6:e4788. doi: 10.7717/peerj.4788 (PMC5970558; doi:10.7717/peerj.4788)
Supplement: Data S4 — The dataset contains the biological replicates absorbance of viability of RIN-5F and WRL 68 cells that treated with serial concentrations of methanolic carob extract for 24, 48 and 72 hours. [file peerj-06-4788-s004.xlsx]

## Sheet: RIN-5F
						1- Raw data of viability of RIN-5F
		1st technical replicate 24 hrs.						2nd technical replicate 24 hrs.								3rd technical replicate 24 hrs.
Conc ug/ml	A1	A2	A3	mean	SD	Viability		Conc ug/ml	A1	A2	A3	mean	SD	Viability		Conc ug/ml	A1	A2	A3	mean	SD	Viability
1000	0.2331	0.1992	0.2412	0.2245	0.0222816	41.677		1000	0.2824	0.293	0.2795	0.284967	0.00710657	44.8366		1000	0.2052	0.2355	0.2061	0.2156	0.0172398	42.6959
500	0.3054	0.2861	0.321	0.304167	0.0174827	56.4666		500	0.3296	0.3019	0.3278	0.319767	0.0154991	50.3121		500	0.3411	0.3315	0.3396	0.3374	0.0051643	66.8163
250	0.3142	0.3162	0.3191	0.3165	0.00246374	58.7562		250	0.4329	0.4299	0.4222	0.428333	0.00551936	67.3939		250	0.3464	0.3493	0.354	0.3499	0.0051643	69.2917
125	0.328	0.341	0.3421	0.337033	0.00784241	62.5681		125	0.4365	0.4545	0.4467	0.4459	0.00902663	70.1579		125	0.3706	0.3757	0.3736	0.3733	0.0025632	73.9257
60	0.3676	0.3521	0.371	0.363567	0.0100749	67.4938		60	0.4762	0.4682	0.4669	0.470433	0.0050362	74.0179		60	0.38	0.3873	0.3891	0.385467	0.00481906	76.3351
30	0.3848	0.3795	0.3882	0.384167	0.00438444	71.3181		30	0.4795	0.4697	0.4799	0.476367	0.00577697	74.9515		30	0.4107	0.4237	0.4201	0.418167	0.00671218	82.8107
15	0.4188	0.4032	0.4201	0.414033	0.00940443	76.8626		15	0.4819	0.491	0.4894	0.487433	0.00485833	76.6927		15	0.439	0.4521	0.447	0.446033	0.00660328	88.3293
7	0.4259	0.41	0.492	0.442633	0.0434857	82.172		7	0.5033	0.552	0.5721	0.542467	0.0353769	85.3517		7	0.4663	0.4462	0.4677	0.460067	0.0120293	91.1083
0	0.5246	0.5583	0.5331	0.538667	0.0175261	100		0	0.6236	0.6585	0.6246	0.635567	0.0198671	100		0	0.4235	0.5583	0.5331	0.504967	0.0716685	100
		1st technical replicate 48 hrs.							2nd technical replicate 48 hrs.								3rd technical replicate 48 hrs.
Conc ug/ml	A1	A2	A3	mean	SD	Viability		Conc ug/ml	A1	A2	A3	mean	SD	Viability		Conc ug/ml	A1	A2	A3	mean	SD	Viability
1000	0.3878	0.3749	0.3541	0.3645	0.0147078	38.916		1000	0.3335	0.3981	0.3441	0.358567	0.0346447	42.3804		1000	0.301	0.3144	0.3918	0.335733	0.0490152	34.6557
500	0.4285	0.4478	0.4388	0.438367	0.00965729	46.8024		500	0.3719	0.4181	0.3722	0.3874	0.0265874	45.7884		500	0.4481	0.4781	0.4562	0.4608	0.01552	47.5656
250	0.489426	0.51936	0.49861	0.502465	0.0153349	53.6459		250	0.4739	0.465	0.481	0.4733	0.00801686	55.9412		250	0.5546	0.5764	0.5624	0.564467	0.011046	58.2665
125	0.5721	0.6069	0.5899	0.589633	0.0174015	62.9524		125	0.4902	0.501	0.5456	0.512267	0.0293682	60.5468		125	0.5976	0.5956	0.5989	0.597367	0.00166233	61.6626
60	0.6332	0.6525	0.6151	0.6336	0.0187032	67.6465		60	0.614	0.61	0.6432	0.6224	0.018124	73.5639		60	0.6903	0.6555	0.6762	0.674	0.017504	69.573
30	0.6808	0.6816	0.6628	0.675067	0.0106308	72.0737		30	0.6921	0.6012	0.6341	0.642467	0.0460239	75.9357		30	0.6998	0.7343	0.7016	0.7119	0.0194198	73.4852
15	0.7498	0.7582	0.6965	0.734833	0.0334623	78.4547		15	0.6331	0.6888	0.753	0.691633	0.0600002	81.7469		15	0.7829	0.728	0.7889	0.7666	0.0335629	79.1315
7	0.7988	0.7982	0.7787	0.7919	0.0114355	84.5475		7	0.7354	0.7017	0.7931	0.7434	0.0462222	87.8654		7	0.7299	0.8901	0.8917	0.837233	0.0929568	86.4226
0	0.9126	0.9541	0.9432	0.936633	0.0215152	100		0	0.8328	0.8571	0.8483	0.846067	0.012303	100		0	0.9962	0.967	0.9431	0.968767	0.026594	100
		1st technical replicate 72 hrs.								2nd technical replicate 72 hrs.							3rd technical replicate 72 hrs.
Conc ug/ml	A1	A2	A3	mean	SD	Viability		Conc ug/ml	A1	A2	A3	mean	SD	Viability		Conc ug/ml	A1	A2	A3	mean	SD	Viability
1000	0.3012	0.293	0.321	0.305067	0.0143949	35.1594		1000	0.2156	0.3431	0.401	0.3199	0.0948524	41.5761		1000	0.3745	0.3931	0.32	0.362533	0.0379908	38.5715
500	0.4363	0.3781	0.3992	0.404533	0.0294643	46.6231		500	0.3216	0.3578	0.4108	0.3634	0.0448629	47.2296		500	0.4402	0.4211	0.5001	0.4538	0.0412186	48.2817
250	0.4171	0.423	0.4762	0.438767	0.0325522	50.5686		250	0.3928	0.4127	0.49411	0.433203	0.053677	56.3016		250	0.4962	0.4777	0.4934	0.4891	0.00997146	52.0375
125	0.5041	0.534	0.5213	0.5198	0.0150063	59.9078		125	0.4701	0.5342	0.5781	0.527467	0.0543139	68.5526		125	0.5538	0.534	0.5678	0.551867	0.0169827	58.7155
60	0.624	0.5992	0.5871	0.603433	0.0188107	69.5467		60	0.6109	0.5782	0.6231	0.604067	0.0232169	78.508		60	0.574	0.6032	0.6332	0.603467	0.0296009	64.2054
30	0.6509	0.6055	0.6932	0.649867	0.0438591	74.8982		30	0.7112	0.7465	0.6893	0.715667	0.0288604	93.0122		30	0.6429	0.6666	0.6789	0.6628	0.0182984	70.5181
15	0.6315	0.7021	0.7561	0.696567	0.062484	80.2804		15	0.7655	0.732	0.7532	0.750233	0.0169459	97.5047		15	0.7127	0.7943	0.8021	0.7697	0.0495173	81.8917
7	0.7502	0.7931	0.72	0.754433	0.0367334	86.9497		7	0.7525	0.7653	0.777	0.764933	0.0122541	99.4152		7	0.8605	0.8212	0.8546	0.845433	0.021193	89.9493
0	0.857	0.925	0.821	0.867667	0.0528141	100		0	0.7833	0.791	0.734	0.769433	0.0309267	100		0	0.9443	0.8991	0.9763	0.9399	0.0387876	100

## Sheet: WRL 68
							Raw data of viability of WRL 68
		1st technical replicate 24 hrs.						2nd technical replicate 24 hrs.								3rd technical replicate 24 hrs.
Conc ug/ml	A1	A2	A3	mean	SD	Viability		Conc ug/ml	A1	A2	A3	mean	SD	Viability		Conc ug/ml	A1	A2	A3	mean	SD	Viability
1000	1.2418	1.0112	1.0232	1.0172	0.129812	90.7593		1000	1.9507	1.9591	1.832	1.91393	0.0710805	88.1266		1000	2.8136	2.4121	2.4102	1.74127	1.52141	55.1662
500	1.1697	1.1002	1.1211	1.13033	0.0356581	100.854		500	2.0844	2.6016	2.432	2.37267	0.263656	109.249		500	2.0942	2.1521	2.012	2.0861	0.0704004	66.0911
250	1.364	1.3552	1.3001	1.33977	0.034633	119.54		250	2.5587	2.7015	2.7231	2.6611	0.0893362	122.53		250	1.8073	2.4093	2.2417	2.15277	0.310697	68.2032
125	1.3247	1.3277	1.3776	1.34333	0.0297137	119.858		125	2.7058	2.5811	2.756	2.68097	0.0900557	123.444		125	1.6948	2.7643	2.219	2.22603	0.534785	70.5244
60	1.4543	1.2914	1.3256	1.3571	0.085897	121.087		60	2.5099	3.0404	2.924	2.82477	0.278824	130.066		60	2.1865	2.7538	2.554	2.4981	0.287752	79.144
30	1.3534	1.3928	1.3667	1.37097	0.0200435	122.324		30	2.6065	2.9297	2.934	2.8234	0.187853	130.003		30	2.2877	2.5797	2.516	2.46113	0.153537	77.9728
15	1.3352	1.5619	1.4233	1.44013	0.114284	128.495		15	2.7707	3.0249	2.9	2.89853	0.127106	133.462		15	2.82	1.8008	2.824	2.822	0.589593	89.4057
7	1.5404	1.8972	1.6234	1.687	0.186709	150.522		7	2.8837	2.7652	2.756	2.80163	0.0712205	129.001		7	3.1046	3.0915	2.9871	3.06107	0.064391	96.9797
0	1.0261	1.046	1.2902	1.12077	0.147071	100		0	2.3276	2.0978	2.09	2.1718	0.134983	100		0	3.7113	2.8274	2.9305	3.1564	0.483315	100
		1st technical replicate 48 hrs.							2nd technical replicate 48 hrs.								3rd technical replicate 48 hrs.
Conc ug/ml	A1	A2	A3	mean	SD	Viability		Conc ug/ml	A1	A2	A3	mean	SD	Viability		Conc ug/ml	A1	A2	A3	mean	SD	Viability
1000	1.049	1.0692	1.1456	1.08793	0.0509519	90.9846		1000	2.1522	1.8424	1.8778	1.95747	0.16957	85.8525		1000	1.4402	1.6461	1.456	1.5141	0.114588	48.9461
500	1.1483	1.1771	1.123	1.14947	0.0270689	96.1307		500	2.8079	2.5405	2.0134	2.27695	0.404262	99.8648		500	2.1536	2.0233	1.9821	2.053	0.0895245	66.3671
250	1.1218	1.1574	1.211	1.1634	0.0449017	97.2959		250	2.4811	2.0992	2.14	2.2401	0.209707	98.2486		250	1.9563	1.8662	2.816	2.21283	0.524297	71.534
125	1.0311	1.5915	1.32	1.3142	0.280245	109.907		125	2.7737	2.6471	2.381	2.51405	0.200437	110.264		125	1.9918	2.4739	2.61	2.35857	0.324837	76.2451
60	1.43	1.5231	1.5501	1.50107	0.0630088	125.535		60	2.8041	2.2921	2.814	2.63673	0.298502	115.645		60	2.3724	2.3918	2.4501	2.40477	0.0404404	77.7386
30	1.5365	1.5654	1.5	1.53397	0.0327735	128.287		30	2.8078	2.5845	2.6213	2.6712	0.119721	117.156		30	2.4797	2.6611	2.913	2.6846	0.217604	86.7848
15	1.4926	1.6883	1.543	1.57463	0.101613	131.688		15	3.129	2.8365	2.367	2.7775	0.384411	121.818		15	2.226	2.947	2.8761	2.68303	0.397387	86.7341
7	1.5216	1.579	1.634	1.5782	0.0562043	131.986		7	3.0231	2.9017	2.913	2.94593	0.0670667	129.206		7	2.9838	2.5734	3.1293	2.8955	0.288277	93.6025
0	1.2346	1.1681	1.1845	1.19573	0.034644	100		0	2.3331	2.2554	2.2516	2.28003	0.0459963	100		0	2.7641	2.8048	3.7113	3.0934	0.535504	100
		1st technical replicate 72 hrs.								2nd technical replicate 72 hrs.							3rd technical replicate 72 hrs.
Conc ug/ml	A1	A2	A3	mean	SD	Viability		Conc ug/ml	A1	A2	A3	mean	SD	Viability		Conc ug/ml	A1	A2	A3	mean	SD	Viability
1000	1.4661	1.4023	1.4208	1.42973	0.0328247	85.0509		1000	0.37	0.345	0.403	0.372667	0.0290918	81.4631		1000	1.4135	1.42	1.3978	1.41043	0.0114133	65.2666
500	1.7175	1.7241	1.7321	1.72457	0.00731118	102.59		500	0.4414	0.4267	0.4011	0.423067	0.0203942	92.4803		500	1.6784	1.623	1.5749	1.62543	0.0517929	75.2156
250	1.7592	1.7541	1.76	1.75777	0.00320052	104.565		250	0.4382	0.4925	0.4019	0.4442	0.045597	97.1		250	1.8397	1.7832	1.7985	1.80713	0.0292227	83.6236
125	1.7837	1.7821	1.799	1.78827	0.0093297	106.379		125	0.5276	0.4992	0.4889	0.505233	0.020043	110.442		125	1.908	1.8543	1.921	1.89443	0.0353591	87.6633
60	1.8952	1.8265	1.801	1.8409	0.048723	109.51		60	0.519	0.5021	0.5798	0.533633	0.0408647	116.65		60	2.0513	2.089	1.989	2.0431	0.0505018	94.5427
30	2.1339	2.1689	2.1365	2.14643	0.0195001	127.685		30	0.5651	0.5781	0.5792	0.574133	0.00784241	125.503		30	2.1184	2.102	2.104	2.10813	0.00894725	97.5521
15	2.1771	2.1754	2.1865	2.17967	0.00597857	129.662		15	0.5668	0.5966	0.59673	0.58671	0.0172427	128.252		15	2.1489	2.173	2.076	2.13263	0.0505045	98.6858
7	2.2141	2.1994	2.21	2.20783	0.00758573	131.338		7	0.6795	0.6043	0.6234	0.635733	0.0390876	138.968		7	2.3643	2.289	2.2981	2.31713	0.0411002	107.223
0	1.7077	1.6156	1.7198	1.68103	0.056989	100		0	0.4443	0.4261	0.502	0.457467	0.039626	100		0	2.0911	2.247	2.145	2.16103	0.079177	100
