# Supplementary material for: Evaluation of the glycemic effect of Ceratonia siliqua pods (Carob) on a streptozotocin-nicotinamide induced diabetic rat model
Source: PeerJ. 2018 May 23;6:e4788. doi: 10.7717/peerj.4788 (PMC5970558; doi:10.7717/peerj.4788)
Supplement: Data S5 — The dataset involves body weight of male and female rats with absolute and relative organs weight within two weeks, as well as biochemical parameters for both male and female rats. [file peerj-06-4788-s005.xlsx]

## Sheet: Body weight
Body weight of male rats								Absolute and relative organ weight of male rats
No	Male	BW0	BW1	BW2				No	Male	BW2	ALW	AKW	AHW	APW	RLW	RKW	RHW	RPW
1	CS5000	380	430	435				1	CS5000	435	13.3	3	1.3	2	0.0305747	0.00689655	0.00298851	0.0045977
2	CS5000	390	435	415				2	CS5000	415	12.3	2.9	1.2	2	0.0296386	0.00698795	0.00289157	0.00481928
3	CS5000	370	415	395				3	CS5000	395	12.5	3	1.4	2.1	0.0316456	0.00759494	0.0035443	0.00531646
4	CS5000	310	350	340				4	CS5000	340	10.4	2.2	1	0.9	0.0305882	0.00647059	0.00294118	0.00264706
5	CS5000	320	360	345				5	CS5000	345	11.5	2.3	1.1	1.5	0.0333333	0.00666667	0.00318841	0.00434783
6	CS5000	395	425	420				6	CS5000	420	13.3	2.8	1.3	2.2	0.0316667	0.00666667	0.00309524	0.0052381
7	CS2000	380	425	410				7	CS2000	410	13.8	2.5	1.4	2.3	0.0336585	0.00609756	0.00341463	0.00560976
8	CS2000	370	415	425				8	CS2000	425	13.3	2.8	1.3	1.9	0.0312941	0.00658824	0.00305882	0.00447059
9	CS2000	350	390	390				9	CS2000	390	11.1	2.5	1.1	1.5	0.0284615	0.00641026	0.00282051	0.00384615
10	CS2000	360	400	395				10	CS2000	395	11.2	2.8	1.5	1.9	0.0283544	0.00708861	0.00379747	0.00481013
11	CS2000	420	470	470				11	CS2000	470	14.1	3.1	1.6	3	0.03	0.00659574	0.00340426	0.00638298
12	CS2000	300	345	350				12	CS2000	350	9.9	2.2	1.2	1.4	0.0282857	0.00628571	0.00342857	0.004
13	NC	340	390	380				13	NC	380	11.7	2.8	0.9	1.8	0.0307895	0.00736842	0.00236842	0.00473684
14	NC	390	430	420				14	NC	420	12.7	3	1.3	1.4	0.0302381	0.00714286	0.00309524	0.00333333
15	NC	380	450	440				15	NC	440	13.6	2.8	1	1.7	0.0309091	0.00636364	0.00227273	0.00386364
16	NC	350	395	390				16	NC	390	13.1	3	1.2	1.6	0.0335897	0.00769231	0.00307692	0.00410256
17	NC	345	390	375				17	NC	375	11.7	2.5	1.1	1	0.0312	0.00666667	0.00293333	0.00266667
18	NC	335	405	390				18	NC	390	13.4	2.5	1.3	1.3	0.034359	0.00641026	0.00333333	0.00333333
								Absolute and relative organ weight of female rats
								No	Female	BW2	ALW	AKW	AHW	APW	RLW	RKW	RHW	RPW
Body weight of female rats								1	CS5000	260	9.5	2	0.9	1.4	0.0365385	0.00769231	0.00346154	0.00538462
								2	CS5000	250	7.3	1.6	0.8	1.3	0.0292	0.0064	0.0032	0.0052
No	Female	BW0	BW1	BW2				3	CS5000	215	6.2	1.6	0.7	0.8	0.0288372	0.00744186	0.00325581	0.00372093
1	CS5000	245	270	260				4	CS5000	235	6.8	1.5	0.9	1	0.0289362	0.00638298	0.00382979	0.00425532
2	CS5000	250	255	250				5	CS5000	235	7.5	1.7	0.8	0.9	0.0319149	0.00723404	0.00340426	0.00382979
3	CS5000	215	260	215				6	CS5000	230	7.1	1.5	0.7	0.9	0.0308696	0.00652174	0.00304348	0.00391304
4	CS5000	225	250	235				7	CS2000	240	6.8	1.6	0.9	1.1	0.0283333	0.00666667	0.00375	0.00458333
5	CS5000	220	245	235				8	CS2000	270	8.1	1.8	1	1.4	0.03	0.00666667	0.0037037	0.00518519
6	CS5000	230	285	230				9	CS2000	265	8.6	1.7	0.9	1.3	0.0324528	0.00641509	0.00339623	0.00490566
7	CS2000	225	245	240				10	CS2000	245	8.1	1.5	0.8	1.2	0.0330612	0.00612245	0.00326531	0.00489796
8	CS2000	250	290	270				11	CS2000	235	7.2	1.4	0.7	0.9	0.0306383	0.00595745	0.00297872	0.00382979
9	CS2000	240	265	265				12	CS2000	210	6.4	1.3	0.8	1	0.0304762	0.00619048	0.00380952	0.0047619
10	CS2000	225	250	245				13	NC	265	8.9	1.6	0.8	1.3	0.0335849	0.00603774	0.00301887	0.00490566
11	CS2000	225	245	235				14	NC	245	7.5	1.7	1	1.2	0.0306122	0.00693878	0.00408163	0.00489796
12	CS2000	195	215	210				15	NC	255	7.6	1.9	0.9	1.4	0.0298039	0.00745098	0.00352941	0.0054902
13	NC	230	270	265				16	NC	245	7.6	1.8	0.8	1.1	0.0310204	0.00734694	0.00326531	0.0044898
14	NC	210	260	245				17	NC	215	7	1.5	0.6	1	0.0325581	0.00697674	0.0027907	0.00465116
15	NC	250	225	255				18	NC	275	8.7	2.2	1	1.3	0.0316364	0.008	0.00363636	0.00472727
16	NC	225	240	245
17	NC	220	240	215
18	NC	245	243	275

## Sheet: Biochemical parameters
	Biochemical parameters for male and female rats
Male	Sample	ALP	AST	Creat	ALT	Urea	T.Bil
	Dose	U/L	U/L	umol/L	U/L	mmol/L	umol/L
	CS5000	134	72	50	43	11.2	6.8
	CS5000	136	137	49	38	11.9	7
	CS5000	142	101	52	40	11.2	7.1
	CS5000	144	81	55	48	12.4	6.6
	CS5000	154	112	54	32	9.3	7.8
	CS2000	66	137	56	39	8.3	6.7
	CS2000	74	121	53	35	7.4	7.3
	CS2000	90	134	55	38	8.3	7.5
	CS2000	71	111	53	31	5.7	7.2
	CS2000	94	103	49	31	7.1	7.7
	NC	73	121	60	37	8.8	7.5
	NC	97	102	55	38	6.22	7.2
	NC	77	102	52	34	7.06	7.3
	NC	71	83	41	35	5.7	6.6
	NC	66	100	51	26	7.5	7.7
Female	CS5000	82	116	55	35	10.3	6.3
	CS5000	121	99	58	39	11.5	7.8
	CS5000	94	133	58	35	9.6	7
	CS5000	82	117	59	36	10.3	7
	CS5000	89	198	59	31	6.4	6.9
	CS2000	108	115	55	33	9.9	8.4
	CS2000	73	177	72	42	7.8	7.8
	CS2000	76	127	53	32	7.4	7.6
	CS2000	49	128	42	28	6	7.1
	CS2000	75	87	44	23	5.7	7
	NC	69	78	65	30	5.3	7.7
	NC	73	105	64	27	6.7	7.9
	NC	74	93	56	32	6.1	7.5
	NC	78	99	54	31	6.4	7.2
	NC	74	94	60	30	6.1	7.6
