# Supplementary material for: Evaluation of the glycemic effect of Ceratonia siliqua pods (Carob) on a streptozotocin-nicotinamide induced diabetic rat model
Source: PeerJ. 2018 May 23;6:e4788. doi: 10.7717/peerj.4788 (PMC5970558; doi:10.7717/peerj.4788)
Supplement: Data S6 — The dataset includes the absorbance of inhibition of methanolic carob extract and α-acarbose as a positive control against α-amylase and α-glucosidase. [file peerj-06-4788-s006.xlsx]

## Sheet: α-amylase
Inhibitory effect of the methanolic extract of carob against α-amylase.
Conc	As	As-Ab	%INHIB 1	As	As-Ab	%INHIB 2	As	As-Ab	%INHIB 3
1000	0.2439	0.0524	85.1009	0.2428	0.0619	81.9849	0.2576	0.068	79.9705
500	0.2855	0.094	73.2727	0.2713	0.0904	73.6903	0.2887	0.0991	70.81
250	0.3261	0.1346	61.7287	0.3019	0.121	64.7846	0.3166	0.127	62.5921
125	0.3437	0.1522	56.7245	0.3317	0.1508	56.1118	0.3349	0.1453	57.2018
62.5	0.3837	0.1922	45.3511	0.3641	0.1832	46.6822	0.3713	0.1817	46.4801
31.25	0.4159	0.2244	36.1956	0.4083	0.2274	33.8184	0.4001	0.2105	37.9971
15.625	0.4271	0.2356	33.0111	0.4183	0.2374	30.908	0.4154	0.2258	33.4904
Ab	0.1915			0.1809			0.1896
Reference	0.3517			0.3436			0.3395
IC50			93.2063			93.2063			92.5479
Conc	%Inhib1	%Inhib2	%Inhib3	Mean	SEM
1000	85.1009	81.9849	79.9705	82.3521	1.49236
500	73.2727	73.6903	70.81	72.591	0.898622
250	61.7287	64.7846	62.5921	63.0351	0.909553
125	56.7245	56.1118	57.2018	56.6793	0.315467
62.5	45.3511	46.6822	46.4801	46.1711	0.414129
31.25	36.1956	33.8184	37.9971	36.0037	1.21009
15.625	33.0111	30.908	33.4904	32.4699	0.793073
1C50	93.2063	93.2063	92.5479	92.9868	0.219449
Inhibitory effect of α-acarbose against α-amylase.
Conc	As	As-Ab	%INHIB	As	As-Ab	%INHIB	As	As-Ab	%INHIB
1000	0.235	0.046	86.9207	0.2346	0.052	84.8661	0.2304	0.0482	85.8026
500	0.2519	0.0629	82.1154	0.2262	0.0436	87.3108	0.2465	0.0643	81.0604
250	0.2936	0.1046	70.2587	0.2592	0.0766	77.7066	0.2524	0.0702	79.3225
125	0.3171	0.1281	63.5769	0.2874	0.1048	69.4994	0.286	0.1038	69.4256
62.5	0.3375	0.1485	57.7765	0.3023	0.1197	65.163	0.3019	0.1197	64.7423
31.25	0.3527	0.1637	53.4547	0.3309	0.1483	56.8394	0.3229	0.1407	58.5567
15.625	0.3884	0.1994	43.304	0.3567	0.1741	49.3306	0.3619	0.1797	47.0692
Ab	0.189			0.1826			0.1822
Reference	0.3517			0.3436			0.3395
IC50			24.7968			22.4834			22.7248
Conc	%Inhib1	%Inhib2	%Inhib3	Mean	SEM
1000	86.9207	84.8661	85.8026	85.8632	0.593868
500	82.1154	87.3108	81.0604	83.4955	1.9318
250	70.2587	77.7066	79.3225	75.7626	2.7912
125	63.5769	69.4994	69.4256	67.5006	1.96199
62.5	57.7765	65.163	64.7423	62.5606	2.39512
31.25	53.4547	56.8394	58.5567	56.2836	1.49882
15.625	43.304	49.3306	47.0692	46.5679	1.75771
1C50	24.7968	22.4834	22.7248	23.335	0.734214

## Sheet: α-glucosidase
Inhibitory effect of the methanolic extract of carob against α-glucosidase.
Methanolic Carob extract
Conc	As	As-Ab	%INHIBI	As	As-Ab	%INHIBI	As	As-Ab	%INHIBI
500	1.2618	0.6342	83.35	1.1708	0.4823	86.8526	1.368	0.6825	82.2469
250	1.9573	1.3297	65.0906	1.9113	1.2228	66.6667	1.8114	1.1259	70.7133
125	2.3287	1.7011	55.34	2.4275	1.739	52.5951	2.2405	1.555	59.5516
62.5	2.7379	2.1103	44.597	2.914	2.2255	39.3332	2.7405	2.055	46.5456
31.125	3.0858	2.4582	35.4634	3.1699	2.4814	32.3574	3.2412	2.5557	33.5215
15.625	3.7274	3.0998	18.6191	3.5976	2.9091	20.6984	3.7291	3.0436	20.8303
Ab	0.6276			0.6885			0.6855
Reference	3.809			3.6684			3.8444
IC50			96.0605			104.707			90.6114
Conc	%inhib1	%inhib2	%inhib3	Mean	SEM
500	83.35	86.8526	82.2469	84.1498	1.38839
250	65.0906	66.6667	65.5109	65.756	0.471203
125	55.34	58.0471	59.5516	57.6462	1.23219
62.5	44.597	46.1482	49.9272	46.8908	1.58285
31.125	22.3366	24.1795	28.3191	24.945	1.76893
15.625	18.6191	9.79446	20.8303	16.4146	3.37106
IC50	96.0605	104.707	90.6114	97.1261	4.10365
Inhibitory effect of α-acarbose against α-glucosidase.
Conc	As	As-Ab	%INHIBI	As	As-Ab	%INHIBI	As	As-Ab	%INHIBI
500	0.3977	0.1798	95.2796	0.3721	0.1693	95.3849	0.384	0.1708	95.5572
250	0.7376	0.5197	86.356	0.6952	0.4924	86.5773	0.6865	0.4733	87.6886
125	1.1416	0.9237	75.7495	1.2309	1.0281	71.9742	1.4027	1.1895	69.0589
62.5	1.5117	1.2938	66.0331	1.6094	1.4066	61.6563	1.6696	1.4564	62.1163
31.125	1.9351	1.7172	54.9173	2.0194	1.8166	50.4798	2.0237	1.8105	52.9055
15.625	2.6277	2.4098	36.7341	2.7027	2.4999	31.8531	2.5393	2.3261	39.4938
Ab	0.2179			0.2028			0.2132
Reference	3.809			3.6684			3.8444
IC50			26.1525			29.0343			25.9681
Conc	%inhib1	%inhib2	%inhib3	Mean	SEM
500	95.2796	95.3849	95.5572	95.4072	0.080902
250	86.356	86.5773	87.6886	86.8739	0.412297
125	75.7495	71.9742	69.0589	72.2609	1.93674
62.5	66.0331	61.6563	62.1163	63.2686	1.38862
31.125	54.9173	50.4798	52.9055	52.7675	1.28286
15.625	36.7341	31.8531	39.4938	36.027	2.23383
IC50	26.1525	29.0343	25.9681	27.0517	0.992769
