# Supplementary material for: Evaluation of the glycemic effect of Ceratonia siliqua pods (Carob) on a streptozotocin-nicotinamide induced diabetic rat model
Source: PeerJ. 2018 May 23;6:e4788. doi: 10.7717/peerj.4788 (PMC5970558; doi:10.7717/peerj.4788)
Supplement: Data S7 — The raw data contains in vivo type 2 diabetic rat parameters. The dataset includes body weight as well as absolute and relative pancreas weight, biochemistry parameters, hemostatic assessment index, weekly fasting blood sugar and oral glucose tolerance test. [file peerj-06-4788-s007.xlsx]

## Sheet: Body weight
Body weight as well as absolute and relative pancreas weight of STZ-NAD diabetic animal model.
	W0	W4	APW	RPW
CS1000	325	312	1.44	0.00461538
CS1000	268	245	0.8	0.00326531
CS1000	290	273	1.05	0.00384615
CS1000	270	274	1.87	0.00682482
CS1000	285	276	1.33	0.00481884
CS1000	294	308	1.14	0.0037013
CS500	280	316	1.06	0.00335443
CS500	275	308	1.68	0.00545455
CS500	287	300	1.91	0.00636667
CS500	290	280	1.55	0.00553571
CS500	248	292	2.09	0.00715753
CS500	260	285	1.43	0.00501754
GD	290	297	1.59	0.00535354
GD	241	313	1.96	0.00626198
GD	303	311	1.67	0.00536977
GD	278	298	1.93	0.00647651
GD	302	316	1.81	0.00572785
GD	280	301	1.77	0.0058804
D0	280	338	2.16	0.00639053
D0	290	335	2.47	0.00737313
D0	268	312	1.57	0.00503205
D0	285	323	1.78	0.00551084
D0	292	340	2.25	0.00661765
D0	320	354	1.91	0.00539548
NC	309	331	2.36	0.00712991
NC	313	329	2.48	0.00753799
NC	261	383	2.55	0.00665796
NC	238	357	2.27	0.00635854
NC	318	409	2.18	0.00533007
NC	284	353	2.18	0.00617564

## Sheet: Biochemistry
Biochemistry parameters of STZ-NAD diabetic animal model
	Sample	T.Prot	Amyl	Trig	Chol
	Dose	g/L	U/L	mmol/L	mmol/L
	CS1000	87.1	2582	0.52	2.5
	CS1000	103.9	2828	0.79	3.4
	CS1000	102.9	3082	0.66	3.1
	CS1000	110.7	3150	1.37	4.4
	CS1000	101.2	2911	0.84	3.4
	CS500	101.1	2877	1.15	2.9
	CS500	87.3	3012	0.75	3.2
	CS500	71.8	2516	0.47	2
	CS500	86.5	3047	0.71	3.2
	CS500	86.7	2863	0.77	2.8
	GD	88.6	3031	0.42	3.4
	GD	107	2769	0.71	2.9
	GD	103	2536	1.04	3.5
	GD	103.5	2694	1.08	2.8
	GD	100.5	2758	0.81	3.2
	D0	85.6	1378	1.11	4
	D0	91.4	2019	0.95	3.1
	D0	58.3	1619	0.24	1.5
	D0	73.1	1852	0.2	1.5
	D0	77.1	1717	0.63	2.5
	NC	85.7	3032	0.39	2.7
	NC	100.9	2529	0.3	2.5
	NC	84.8	2900	0.48	2.5
	NC	91	3106	0.92	3.1
	NC	90.6	2892	0.52	2.7

## Sheet: HOMA
		Hemostatic assessment index of STZ-NAD diabetic animal model.
										HOMA MODLE 2			Gluc
	A1	A2	MEAN	SD	AV-B	BLANK	CONC pg/ml	ins (pmol/L	INS(µU/ml)	B	S	IR	mmol/L
CS1000	0.7764	0.8087	0.79255	0.0228395	0.6355	0.15705	423.667	70.6117	10.1673	29.9	65.1	1.54	10.1
CS1000	1.015	1.2423	1.12865	0.160725	0.9716	0.15705	647.733	107.955	15.5443	46.8	43.7	2.29	9.4
CS1000	0.8023	0.8945	0.8484	0.0651953	0.69135	0.15705	460.9	76.8167	11.0607	31.3	59.8	1.67	10.2
CS1000	0.8979	0.9138	0.90585	0.011243	0.7488	0.15705	499.2	83.2	11.9798	25.3	53.2	1.88	11.9
CS1000	0.9879	0.9318	0.95985	0.0396687	0.8028	0.15705	535.2	89.2	12.8438	36.9	52	1.92	9.9
CS1000	0.9043	1.0443	0.9743	0.0989949	0.81725	0.15705	544.833	90.805	13.0749	33.1	50.4	1.98	10.6
CS500	0.9219	0.8515	0.8867	0.0497803	0.72965	0.15705	486.433	81.0717	11.6734	21.9	53.1	1.88	12.8
CS500	0.8532	0.9979	0.92555	0.102318	0.7685	0.15705	512.333	85.3883	12.2949	28.3	52.7	1.9	11.3
CS500	0.7095	0.7673	0.7384	0.0408708	0.58135	0.15705	387.567	64.595	9.30094	20.2	67.9	1.47	12.1
CS500	0.9051	0.9964	0.95075	0.0645589	0.7937	0.15705	529.133	88.1883	12.6981	20.5	46.6	2.15	13.9
CS500	0.9099	0.798	0.85395	0.0791253	0.6969	0.15705	464.6	77.4333	11.1495	23.5	57.2	1.75	12
CS500	0.7785	0.8437	0.8111	0.0461033	0.65405	0.15705	436.033	72.6717	10.4639	22.7	61.1	1.64	11.9
GD	0.948	0.8059	0.87695	0.10048	0.7199	0.15705	479.933	79.9883	11.5174	70.5	62.9	1.59	6.7
GD	1.0355	1.0555	1.0455	0.0141421	0.88845	0.15705	592.3	98.7167	14.2141	104.4	52.7	1.9	5.9
GD	0.7937	1.0265	0.9101	0.164614	0.75305	0.15705	502.033	83.6717	12.0478	79.4	60.9	1.64	6.4
GD	1.1658	1.288	1.2269	0.0864085	1.06985	0.15705	713.233	118.872	17.1162	83.7	42.2	2.37	7.1
GD	1.0077	0.9087	0.9582	0.0700036	0.80115	0.15705	534.1	89.0167	12.8174	85.6	57.4	1.74	6.3
GD	0.8554	0.8588	0.8571	0.00240414	0.70005	0.15705	466.7	77.7833	11.1999	71.3	64.7	1.55	6.6
D0	0.7313	0.8074	0.76935	0.0538108	0.6123	0.15705	408.2	68.0333	9.79602	17	60.7	1.65	13.7
D0	0.8331	0.7676	0.80035	0.0463155	0.6433	0.15705	428.867	71.4783	10.2921	16.6	56.3	1.58	11.2
D0	0.8029	0.6911	0.747	0.0790545	0.58995	0.15705	393.3	65.55	9.43844	16.5	62.9	1.59	13.7
D0	0.8549	0.8847	0.8698	0.0210718	0.71275	0.15705	475.167	79.195	11.4032	18.1	51	1.96	14.2
D0	0.746	0.9139	0.82995	0.118723	0.6729	0.15705	448.6	74.7667	10.7655	18.9	56.4	1.77	13.5
D0	0.7979	1.0052	0.90155	0.146583	0.7445	0.15705	496.333	82.7217	11.911	17.5	47.1	2.12	14.8
NC	1.006	1.1147	1.06035	0.0768624	0.9033	0.15705	602.2	100.367	14.4516	151.3	54.4	1.84	4.9
NC	1.1703	1.3681	1.2692	0.139866	1.11215	0.15705	741.433	123.572	17.7929	139.7	43	2.33	5.5
NC	1.163	1.1225	1.14275	0.0286379	0.9857	0.15705	657.133	109.522	15.7699	174.1	50.6	1.98	4.7
NC	1.1016	0.998	1.0498	0.0732563	0.89275	0.15705	595.167	99.195	14.2829	144	54.9	1.82	5.2
NC	0.9207	1.3217	1.1212	0.28355	0.96415	0.15705	642.767	107.128	15.4252	164.9	51.3	1.95	4.8
NC	1.1357	1.1275	1.1316	0.00579823	0.97455	0.15705	649.7	108.283	15.5916	205.7	52.5	1.9	4.3
						STD
					CONC	A1	A2	AVE	AVE-BLNK
					2500	3.51096	3.44	3.47548	3.32143
					1250	2.21643	2.34883	2.28263	2.12858
					625	1.51083	1.39998	1.4554	1.30135
					312.5	0.935474	1.0106	0.973037	0.818987
					156.25	0.512408	0.6112	0.561804	0.407754
					Blank	0.1564	0.1517	0.15405

## Sheet: Weekly fasting blood sugar
Weekly fasting blood sugar of STZ-NAD diabetic animal model
	W0	W1	W2	W3	W4
CS1000	11.2	11	10.2	9.5	8.8
CS1000	12.8	12.4	11.8	10.2	10
CS1000	12.7	12.3	10.8	10.7	10.3
CS1000	13.7	13.5	11	10.8	9.7
CS1000	14	13.8	12.4	10.9	9.8
CS1000	14.9	14.7	12	10.3	10.1
CS500	11.8	11.5	11.6	11.2	11.2
CS500	15.1	14.8	13.9	13	12.4
CS500	15.3	14.2	13.9	12.4	12.2
CS500	13.7	13.3	12.8	12.5	12.1
CS500	14.4	14.1	13.7	12.5	11.6
CS500	13.1	12.2	12.8	12.7	11.9
GD	12.4	10.7	9.8	9.4	6.5
GD	11.7	11	7.5	6.5	6.2
GD	10.8	10.5	9.5	6.4	6.3
GD	13.4	11.9	9.5	7.2	7
GD	11.6	10.4	8.6	6.3	6.1
GD	12.7	11.3	8.9	6.4	6.2
D0	10.5	11.2	14	12.4	14
D0	10.8	10.9	12.4	13.7	14.3
D0	11.9	13.9	13.1	14.9	14.7
D0	11.4	11.8	14.1	13.9	15.3
D0	13.3	14.3	14.6	14.4	14.9
D0	12.5	12.1	13.5	14	14.8
NC	4.9	5.5	4.7	5.7	5.8
NC	5.4	5.3	5	5.1	5.9
NC	4.6	4.8	4.9	5.3	5.7
NC	4.9	4	5.5	5.7	5.1
NC	5.2	5.2	5.1	5.6	5.6
NC	4.6	5.1	5.3	5.7	5.3

## Sheet: OGTT
Oral glucose tolerance test (OGTT)
	0min	30 min	60 min	90 min	120 min
CS1000	10.1	17.6	20.6	14.7	13.7
CS1000	9.4	19.3	21.8	17.4	14.9
CS1000	10.2	18.9	20.9	16.6	13.8
CS1000	11.9	17.8	20.1	13.5	12.7
CS1000	9.9	16.5	22.5	15	13
CS1000	10.6	16.4	18.7	15.2	13.5
CS500	12.8	16.4	22.3	17.5	15.4
CS500	11.3	17.5	23.4	18.8	14.7
CS500	12.1	16.7	19.9	16.2	13.2
CS500	13.9	16.8	20.5	15.7	14.8
CS500	12	19.9	24.4	19.9	15.4
CS500	11.9	15.5	18.3	16.4	14.5
GD	6.7	15.6	10	8.3	6
GD	5.9	11.2	10.2	8.9	6.2
GD	6.4	10.7	9.4	7.5	6.4
GD	7.1	16.1	12.6	9.9	7.3
GD	6.3	13.6	11.8	9.5	6.1
GD	6.6	9.7	8.5	6.9	6.2
D0	13.7	17.4	21.6	24.4	27.2
D0	11.2	15.8	22.7	25.8	25.1
D0	13.7	17.6	22.4	26	28.5
D0	14.2	20	26	28.3	31.7
D0	13.5	18.3	19.4	25	29.1
D0	14.8	19.2	22.1	24.5	27.8
NC	4.9	8.2	7.9	7	5.1
NC	5.3	7	8	6.2	5.5
NC	4	7.5	8.2	6.4	5.8
NC	5.2	8.9	10	7.1	5.3
NC	4.8	8.6	9.1	7.2	5.2
NC	4.3	9.3	9.4	6.8	4.9
